# Supplementary material
Source: PubMed Central journal article supplement (PMC8692530)
Supplement: 12250_2021_449_MOESM1_ESM.pdf [file 12250_2021_449_MOESM1_ESM.pdf]

## Electronic Supplementary Material

## Construction and Characterization of A Novel Bacmid AcBac-Syn Based on A Synthesized Baculovirus Genome

Yu Shang<sup>1,2</sup> · Hengrui Hu<sup>2,3</sup> · Xi Wang<sup>2</sup> · Hualin Wang<sup>2</sup> · Fei Deng<sup>2</sup> · Manli Wang<sup>2</sup> · Zhihong Hu<sup>2</sup>

1. Key Laboratory of Prevention and Control Agents for Animal Bacteriosis (Ministry of Agriculture and Rural Affairs) & Hubei Provincial Key Laboratory of Animal Pathogenic Microbiology, Institute of Animal Husbandry and Veterinary, Hubei Academy of Agricultural Sciences, Wuhan 430064, China.
2. State Key Laboratory of Virology, Wuhan Institute of Virology, Chinese Academy of Sciences, Wuhan 430071, China.
3. University of Chinese Academy of Sciences, Beijing 100049, China;

Supporting information to DOI: 10.1007/s12250-021-00449-w

Supplementary Table S1 The primers used in this research

| Name          | Sequence <sup>a</sup>                                                                              | Product size / bp |
|---------------|----------------------------------------------------------------------------------------------------|-------------------|
| pGF-F-Kan     | 5'-GTCTGGATCTGATCACTGCTT <b>GAGCCTAGGAG</b> <u>CCTTAGG</u> TTC<br>GCCAAAAGTTGGCCCAG-3'             | 8641              |
| pGF-R-egfp    | 5'-GCGGCCGCTCCGGAATTCTAGAAGGATCGAATATAACTTCGTA<br>TAATGTATGCTATACG-3'                              |                   |
| Kan-F         | 5'-CTTCGTATAGCATAACATTATACGAAGTTATATTCGATCCTTCTA<br>GAATCCGGAGCGGC-3'                              | 2154              |
| LacZ-R        | 5'-CGGCCAGAGAAATTTCTCGAGTACAACATTTTGCGCACGGTTA<br>TGT-3'                                           |                   |
| egfp-F        | 5'-CATAACCGTGCGCAAATGTTGTACTCGAGAAATTTCTCTGGC<br>CGTT-3'                                           | 1471              |
| egfp-R        | 5'-GAAGCCCTGGGCCAACTTTTGCGCAA <u>CCTAAGG</u> CTCCTAGGC<br>TCAAGCAGTGATCAGAT-3'                     |                   |
| pGF(K)-F-Bac1 | 5'-TATATACCTCAAAAATATTTACATTTTTGCAATCAGTAAAAT<br>ATACATG <b>CCTTAGG</b> TTCCGAAAAGTTGGCCCAG-3'     | 12197             |
| pGF(K)-R-Bac1 | 5'-TATTGTAAAAAATATTACACGTTGTTTCATTGACGTCACAAA<br>ATTT <b>CCTAAGG</b> CTCCTAGGCTCAAGCAGTGATCAGAT-3' |                   |

<sup>a</sup>primer pairs of pGF-F-Kan & pGF-R-egfp, Kana-F & LacZ-R and egfp-F & egfp-R were used for constructing pGF(K)-egfp plasmid; each primer contained 23-37 nt hook sequences of neighbor fragment marked by shadow; a *Bsu36I* site in the middle of primer pGF-F-Kana and egfp-R was in. pGF(K)-F-Bac1 and pGF(K)-R-Bac1 primers contains 3 parts, sequences identical or complementary to that of AcMNPV were marked by shadow, the *Bsu36I* site were in bold and underlined, and the rest unmarked were sequences identical or complementary to that of the vector pGF(K)-egfp.
